# Supplementary material for: Genome-Wide Association Study Identifies ZNF354C Variants Associated with Depression from Interferon-Based Therapy for Chronic Hepatitis C
Source: PLOS journal article supplement (doi:10.1371/journal.pone.0164418), 2016-10-10
Supplement: S1 (10.1371/journal.pone.0164418.s001) [file journal.pone.0164418.s001]

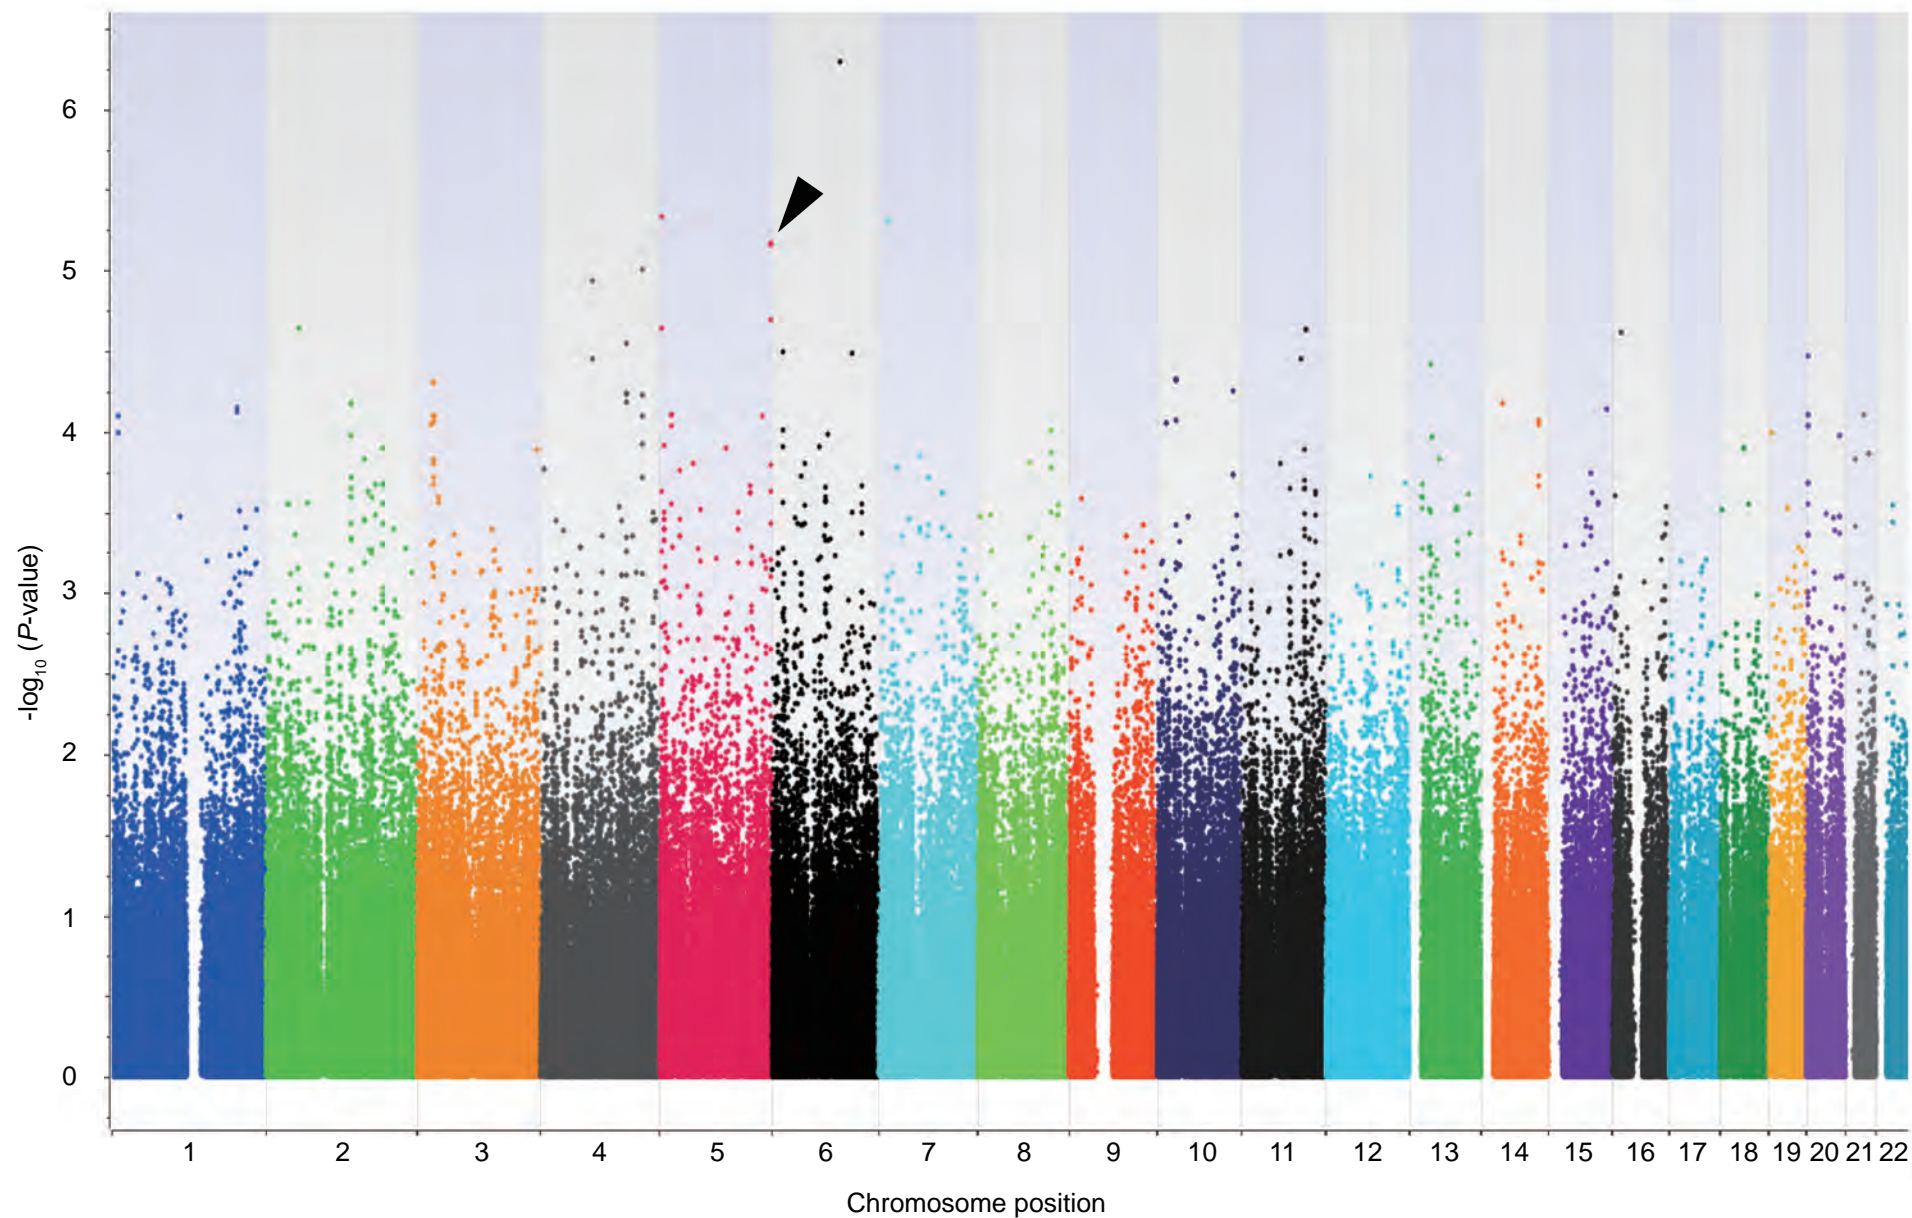

**S1 Fig. Genome-wide association results of 224 Japanese HCV-infected patients with depression induced by IFN-based therapy (45 patients with depression and 179 patients without depression).**

*P*-values were calculated using the chi-square test for allele frequencies. Dot with arrow on chromosome 5 indicates the rs1863918 SNP ( $P=2.05\times 10^{-5}$ ) that is strongly associated with IFN-induced depression.
